# Supplementary material
Source: PubMed Central journal article supplement (PMC3247998)
Supplement: supp_M111.307447_jbc.M111.307447-1.pdf [file supp_M111.307447_jbc.M111.307447-1.pdf]

## Supplementary information

**Table S1**

Oligonucleotide primers used in this study <sup>a</sup>

| Primers <sup>a</sup> | Sequence (5'-3')                                      | Reference          |
|----------------------|-------------------------------------------------------|--------------------|
| FPpks2RT             | GTTGTGGAAGGCGTTGTTAC                                  | This work          |
| RPpks2RT             | GTCGTAGAACTCGTCGCAAT                                  | This work          |
| FPmsl3RT             | GTGAAAACAAACTTCGGTCAC                                 | This work          |
| RPmsl3RT             | ACAAAGAGTTCAGTGTCAATCTCAG                             | This work          |
| FPsigART             | ACTTTGCTGCAGGATCAACT                                  | This work          |
| RPsigART             | AACTTCGACATAGTCTTGGATTC                               | This work          |
| pks2PEx              | AGCCAACGTCCATGCACCCCTATC                              | This work          |
| msl3PEx              | GAATCTCACCCACCAAATCGTCGCCCG                           | This work          |
| FPpks2up1            | AATAATGGATCCGAAGCGTCAGACTACCGG                        | This work          |
| RPpks2up1            | AATAATGGTACCTATCTGCACCAGTGCCTG                        | This work          |
| FPpks2up2            | AATAATGGATCCCCATGCCACGACAAACC                         | This work          |
| RPpks2up2            | AATAATGGTACCTCTTTGGTGGCTCTTTAG                        | This work          |
| FPpks2up3            | AATAATGGATCCGCTTAGAACTAAAGAGCC                        | This work          |
| RPpks2up3            | AATAATGGTACCGCCGCCGACCCCAAGCCC                        | This work          |
| FPphoPup             | GTTATTGGATCCCTGGCCAGCCGGTTG                           | This work and (38) |
| RPphoP               | GGTGGTGGTACCTCAGTGGTGGTGGTGGTGGTGTGCGAG<br>GCTCCCG    | This work          |
| FPphoPD71N           | GTGATCCTCAACGTGATGATGCCC                              | This work and (39) |
| RPphoPD71N           | CATCATCACGTTGAGGATCACCGC                              | This work and (39) |
| FPmsl3up1            | GTTATTGGATCCCCTTTTGGCTCTGCT                           | This work          |
| RPmsl3up1            | GTTCATGGTACCCGCCCGGGAGCCGGC                           | This work          |
| FPmsl3up2            | GGTGGTGGATCCTGCATGCTGCTGTGG                           | This work          |
| RPmsl3up2            | GTTGTTGGTACCCTGTTGTGGGACTTG                           | This work          |
| FPmsl3up3            | GGTGGTGGATCCATGTGTTCTTCGTCG                           | This work          |
| RPmsl3up3            | GTTGTTGGTACCCAGCACGACGAAGAA                           | This work          |
| FPmsl3up4            | GGTGGTGGATCCCCTACGACGTCTGGT                           | This work          |
| phoPstart            | GTTTGCCATATGCGGAAAGGGGTTGAT                           | This work and (38) |
| MphoPstop            | GGTGGTCTGCAGTCAGTGGTGGTGGTGGTGGTGTGCGAG<br>GCTCCCGCAG | This work          |
| FPpks2sDR2           | TTCGATGTAGCTGTTGAGGGTTGGGCTCTTTAGTTCT                 | This work          |
| RPpks2sDR2           | AGAACTAAAGAGCCCAACCCTCAACAGCTACATCGAA                 | This work          |
| FPmsl3sDR2           | TCTGGTAGCGGCATGGCCATTAAGTTGAGTTGGCT                   | This work          |
| RPmsl3sDR2           | AGCCAACCTCAACTTAATGGGCCATGCCGCTACCAGA                 | This work          |

<sup>a</sup>FP, forward primer; RP, reverse primer

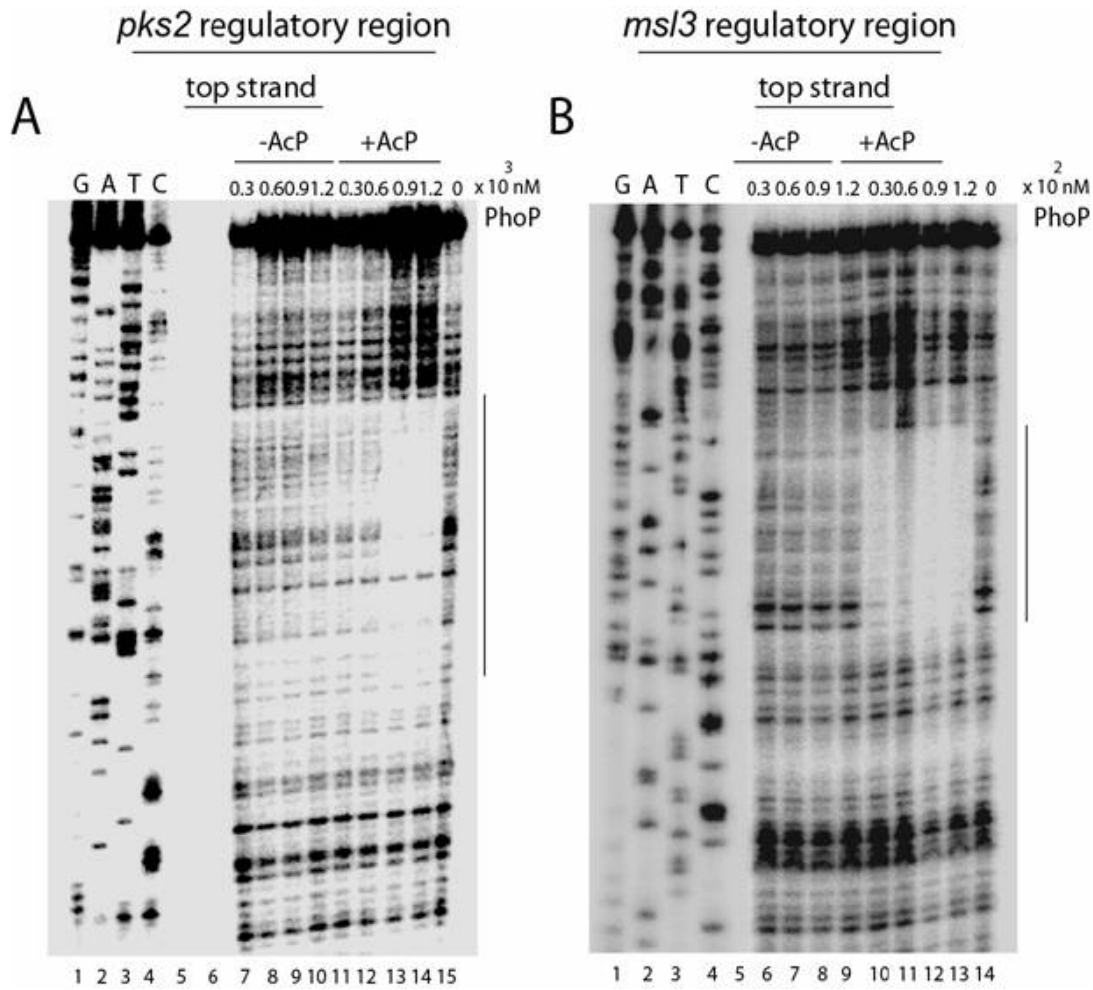

**Figure S1.** DNase I protection mapping of PhoP binding to *pks2* and *msl3* regulatory region(s).  $\approx$  50 fmol of A. *pks2up3* and B. *msl3up4* fragments each carrying the label at the top strands were incubated with increasing concentrations of PhoP pre-incubated in phosphorylation mix in absence (*lanes 7-10* for *pks2up3*; *lanes 6-9* for *msl3up4*) or presence of AcP (*lanes 11-14* for *pks2up3*; *lanes 10-13* for *msl3up4*), and in absence of PhoP protein (*lane 15* for *pks2up3*, and *lane 14* for *msl3up4*), respectively prior to digestion with DNaseI as described in the Experimental procedures. G, A, T and C designate the DNA sequencing ladder generated for each strand. The protected regions on each of the top strands are indicated by *vertical lines*.

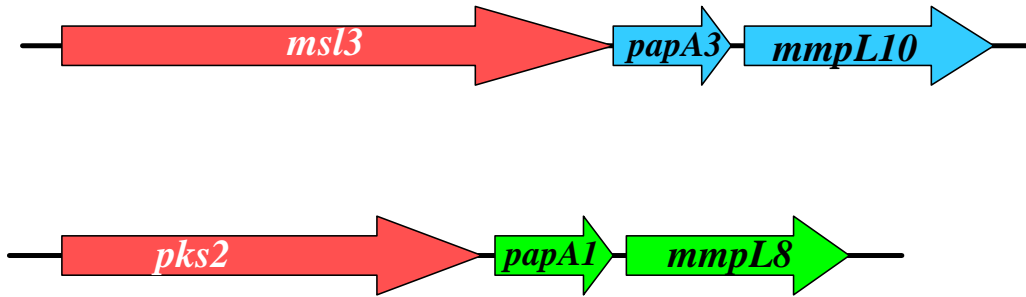

**Figure S2.** Genetic organization of *pks2* and *msl3* gene clusters of *M. tuberculosis*. For both clusters, the intergenic region(s) are relatively short and thus, unlikely to include important regulatory regions, suggesting that the genes are part of the respective operon(s).
